# Supplementary figures and images for: Comprehensive prediction in 78 human cell lines reveals rigidity and compactness of transcription factor dimers
Source: HighWire-hosted journal article supplement (doi:10.1101/gr.154922.113), 2013-04-03

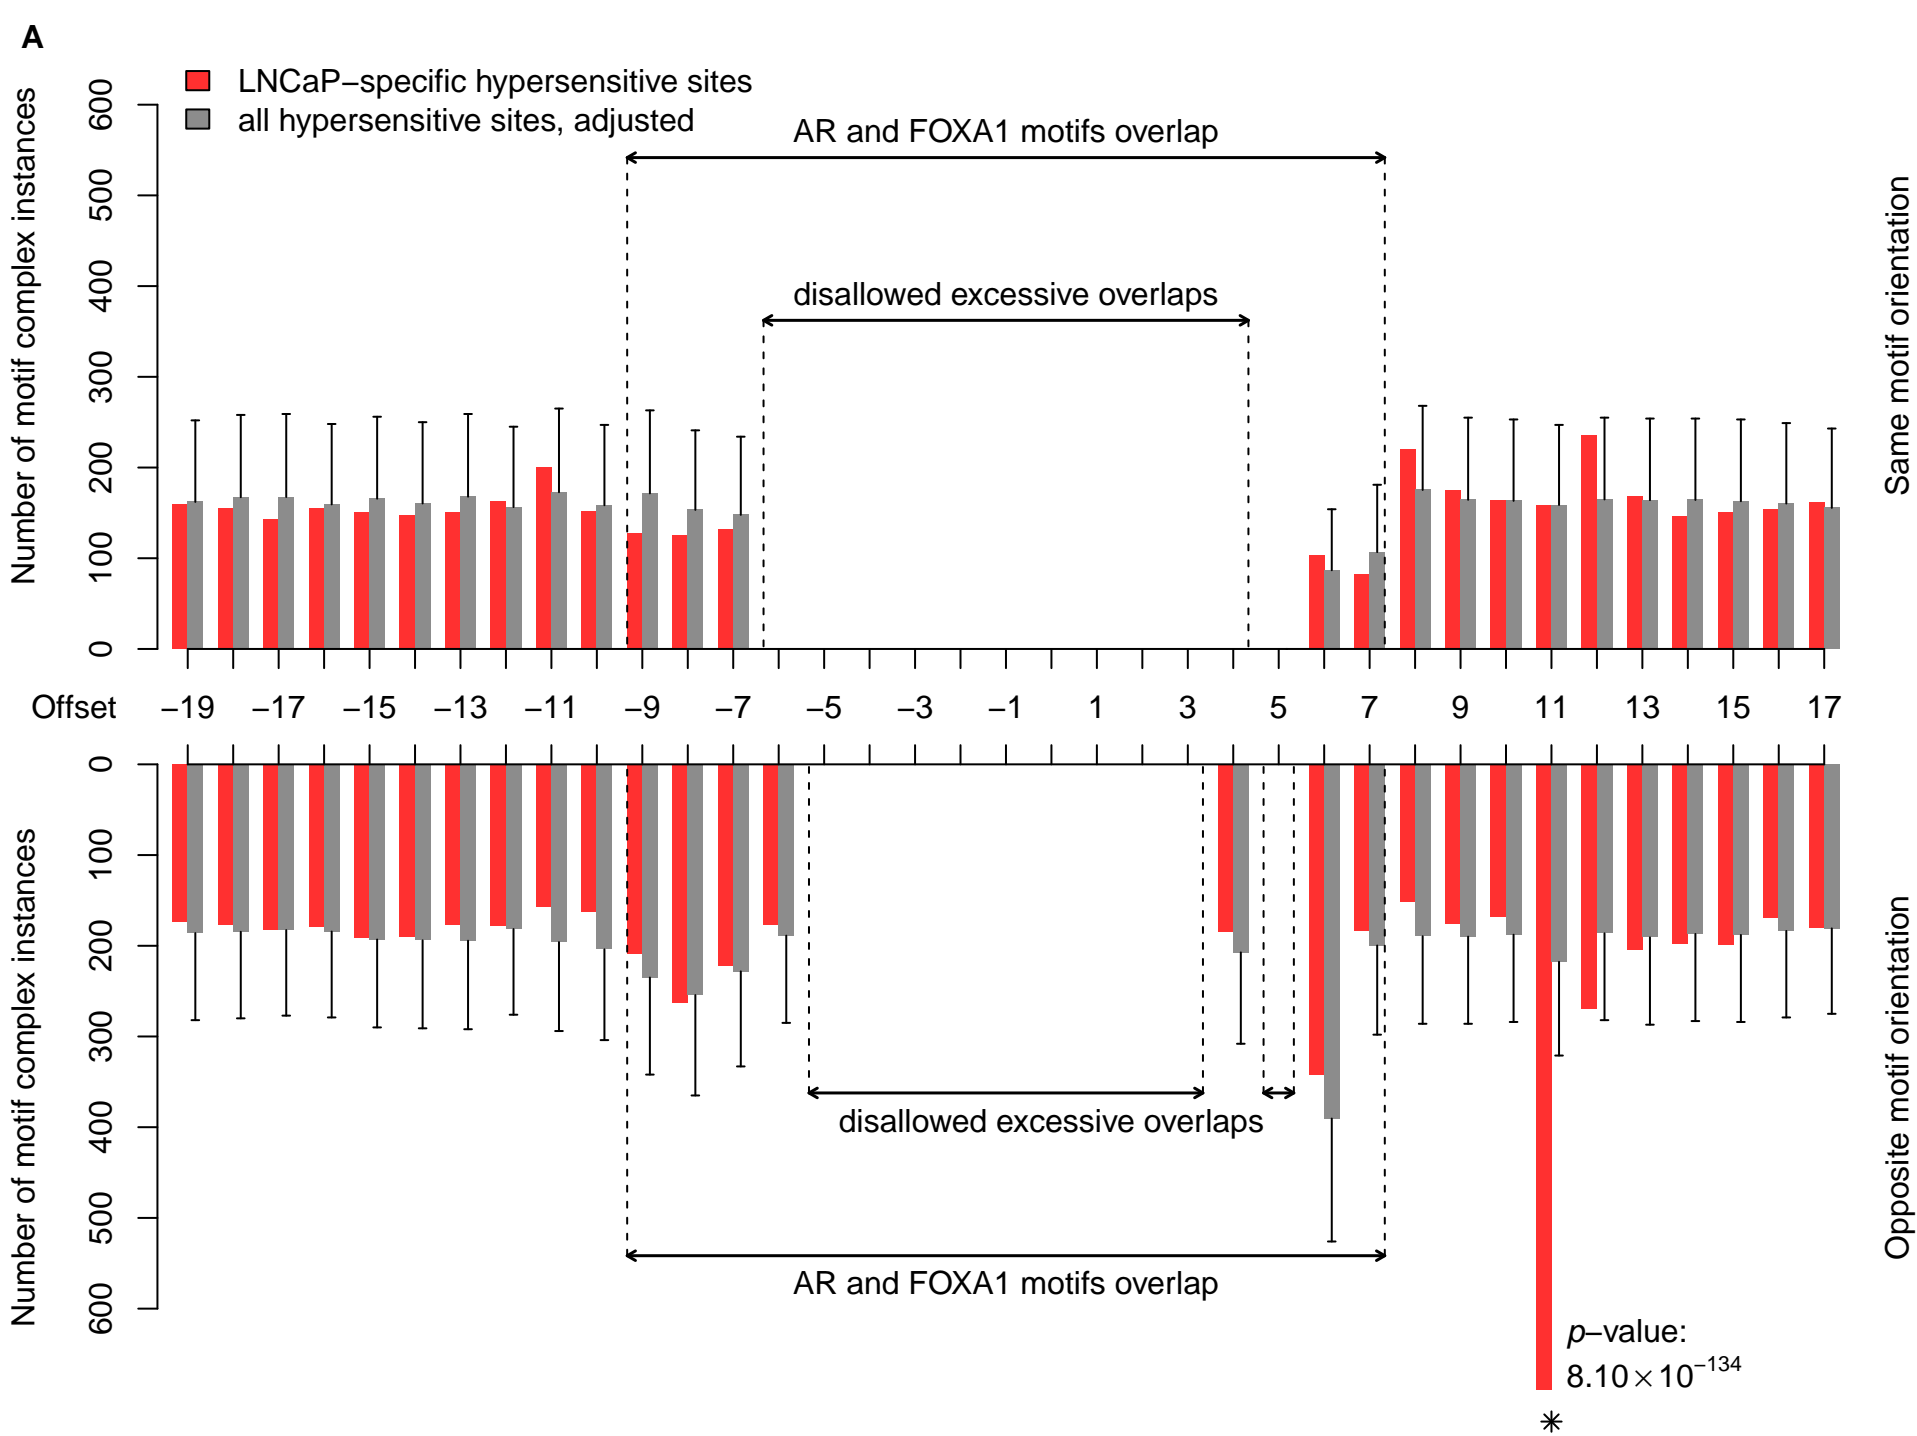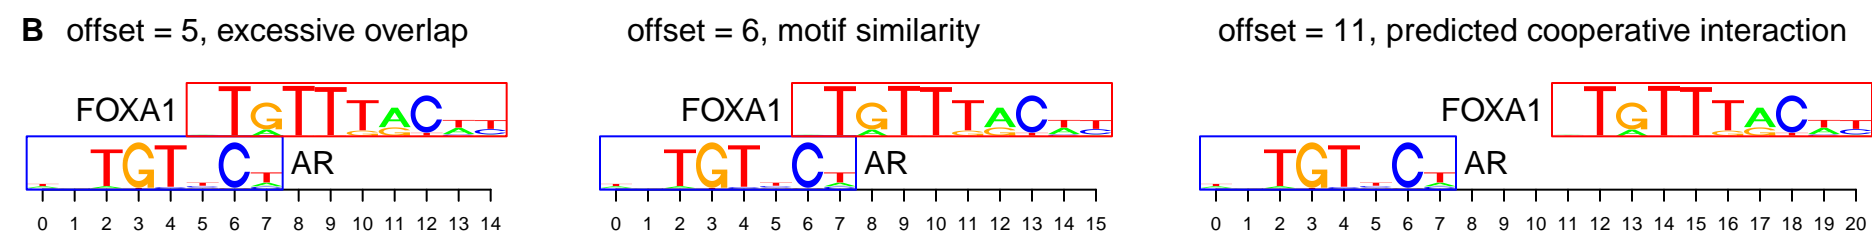

Supplement: Supp_Fig2.pdf [file Supp_Fig2.pdf]
